# Supplementary material for: Phase I study of the gamma secretase inhibitor PF-03084014 in combination with docetaxel in patients with advanced triple-negative breast cancer
Source: PubMed Central journal article supplement (PMC5356802; doi:10.18632/oncotarget.13727), 2016-11-30
Supplement: oncotarget-08-2320-s001.pdf [file oncotarget-08-2320-s001.pdf]

# **Phase I study of the gamma secretase inhibitor PF-03084014 in combination with docetaxel in patients with advanced triple-negative breast cancer**

## **Supplementary Material**

**Supplemental Methods:** Study design and analysis

**Supplemental Table S1:** Potential dose combinations

**Supplemental Table S2:** Dose-limiting toxicities in first treatment cycle

**Supplemental Table S3:** Response to treatment with PF-03084014 and docetaxel by dose level (n = 25)

## **Supplemental Methods**

### ***Study Design***

A modified toxicity probability interval (mTPI) study design based on a Bayesian statistics framework and a beta/binomial hierarchical model was used to determine dose escalation/de-escalation in the dose-finding part of this study. If the toxicity rate at the selected dose level was far smaller than the target rate ( $p_T = 0.30$ ), the mTPI would recommend escalating the dose level; if it was close to  $p_T$ , the mTPI would recommend continuing at the selected dose; if it was far greater than  $p_T$ , the mTPI would recommend deescalating the dose level.

Reference: Ji Y et al. A modified toxicity probability interval method for dose-finding trials. *Clin Trials*. 2010; 7: 653–663.

### ***Analysis***

The safety analysis set included all enrolled patients who received at least one dose of study medication. Patients who were lost to follow-up before receiving at least 80% of

the planned first-cycle dose due to reasons unrelated to treatment were not evaluable for DLT. The response analysis set included all enrolled patients who had baseline assessments and at least one on-study tumor assessment. Patients who were treated and removed from the study prior to on-study tumor assessment because of disease progression were considered evaluable for efficacy and counted as treatment failures.

**Supplemental Table S1: Potential dose combinations**

| <b>Dose level</b> | <b>PF-03084014 (mg BID)</b> | <b>Docetaxel (mg/m<sup>2</sup>)</b> |
|-------------------|-----------------------------|-------------------------------------|
| 1                 | 80                          | 75                                  |
| 2a                | 80                          | 100                                 |
| 2b                | 100 (starting dose)         | 75 (starting dose)                  |
| 3a                | 100                         | 100                                 |
| 3b                | 150                         | 75                                  |
| 4                 | 150                         | 100                                 |

BID, twice daily.

**Supplemental Table S2: DLTs in first treatment cycle**

|                                  | <b>PF-03084014 100 mg<br/>BID/docetaxel 75<br/>mg/m<sup>2</sup><br/>(n = 8)</b> | <b>PF-03084014 100 mg<br/>BID/docetaxel 100<br/>mg/m<sup>2</sup><br/>(n = 3)</b> | <b>PF-03084014 150 mg<br/>BID/docetaxel 75<br/>mg/m<sup>2</sup><br/>(n = 11)</b>                              |
|----------------------------------|---------------------------------------------------------------------------------|----------------------------------------------------------------------------------|---------------------------------------------------------------------------------------------------------------|
| DLT-evaluable patients, <i>n</i> | 8                                                                               | 3                                                                                | 11                                                                                                            |
| DLT events, <i>n</i> (%)         | 1 (13%)<br>Grade 3 diarrhea                                                     | 1 (33%)<br>Grade 3 diarrhea and<br>grade 4 febrile<br>neutropenia                | 4 (36%)<br>Grade 3 dehydration,<br>grade 3 nausea,<br>grade 4 febrile<br>neutropenia,<br>grade 5 septic shock |

DLT, dose-limiting toxicity.

**Supplemental Table S3: Best overall response to treatment with PF-03084014 and docetaxel by dose level (*n* = 25, response-evaluable set)**

|                                                       | <b>PF-03084014<br/>100 mg BID/<br/>docetaxel 75<br/>mg/m<sup>2</sup><br/>(<i>n</i> = 14)</b> | <b>PF-03084014<br/>100 mg BID/<br/>docetaxel 100<br/>mg/m<sup>2</sup><br/>(<i>n</i> = 3)</b> | <b>PF-03084014<br/>150 mg BID/<br/>docetaxel 75<br/>mg/m<sup>2</sup><br/>(<i>n</i> = 8)</b> | <b>All dose<br/>levels<br/>(<i>N</i> = 25)</b> |
|-------------------------------------------------------|----------------------------------------------------------------------------------------------|----------------------------------------------------------------------------------------------|---------------------------------------------------------------------------------------------|------------------------------------------------|
| Complete response, <i>n</i> (%)                       | 0                                                                                            | 0                                                                                            | 0                                                                                           | 0                                              |
| Partial response, <i>n</i> (%)                        | 2 (14)                                                                                       | 0                                                                                            | 2 (25)                                                                                      | 4 (16)                                         |
| Stable disease, <i>n</i> (%)                          | 6 (43)                                                                                       | 1 (33)                                                                                       | 2 (25)                                                                                      | 9 (36)                                         |
| Progressive disease, <i>n</i> (%)                     | 6 (43)                                                                                       | 2 (67)                                                                                       | 3 (38)                                                                                      | 11 (44)                                        |
| Indeterminate <sup>a</sup> , <i>n</i> (%)             | 0                                                                                            | 0                                                                                            | 1 (13)                                                                                      | 1 (4)                                          |
| Objective response rate, <i>n</i> (%)<br>95% exact CI | 2 (14)<br>1.8–42.8                                                                           | 0<br>0.0–70.8                                                                                | 2 (25)<br>3.2–65.1                                                                          | 4 (16)<br>4.5–36.1                             |

<sup>a</sup>Indeterminate response due to stable disease prior to new anticancer treatment on study day 37, thus earlier than 6 weeks. CI, confidence interval.
